# Supplementary material for: Phase 1 study of intraventricular 131I-omburtamab targeting B7H3 (CD276)-expressing CNS malignancies
Source: PubMed Central journal article supplement (PMC9655863; doi:10.1186/s13045-022-01383-4), 2022-11-12

Supplemental figure S1. Consort diagram.

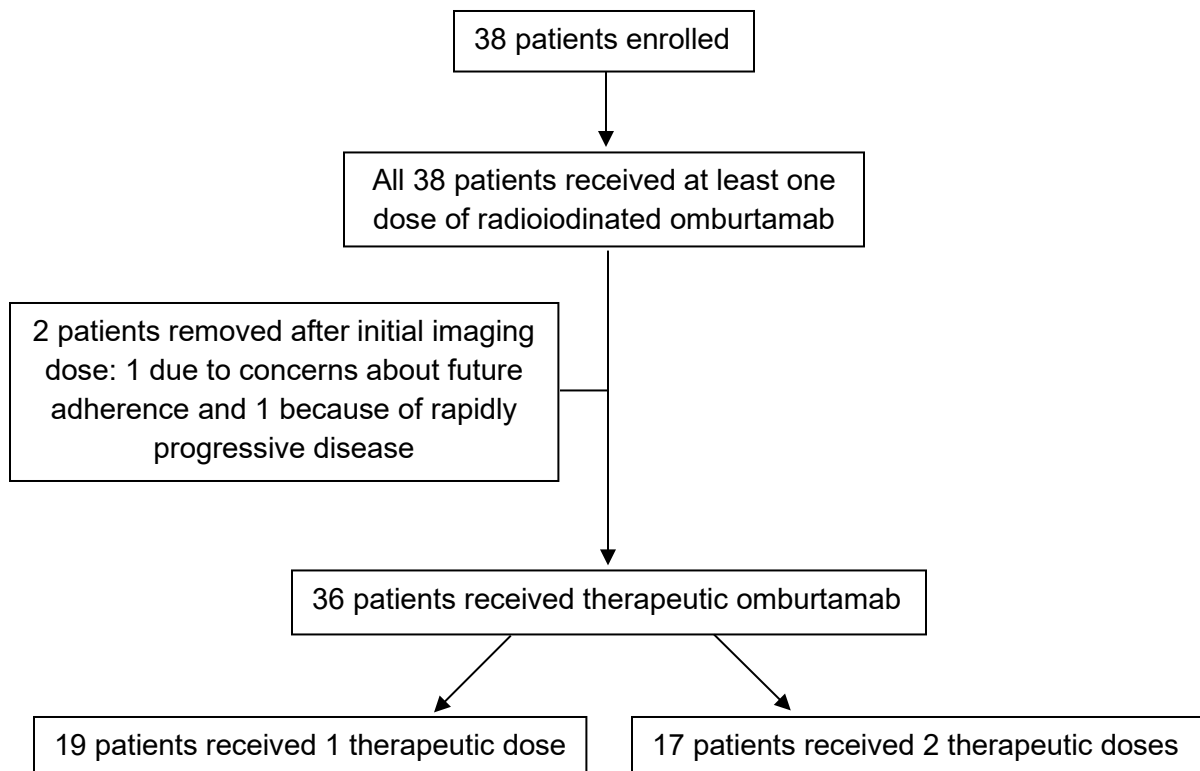

Supplement: 13045_2022_1383_MOESM1_ESM.pdf [file 13045_2022_1383_MOESM1_ESM.pdf]
